# Supplementary material for: Bond-forming and electron-transfer reactivity between Ar2+ and N2
Source: Royal Society of Chemistry journal article supplement (doi:10.1039/d1cp00918d), 2021-01-01
Supplement: d1cp00918d1.pdf [file d1cp00918d1.pdf]

## Supplementary Information

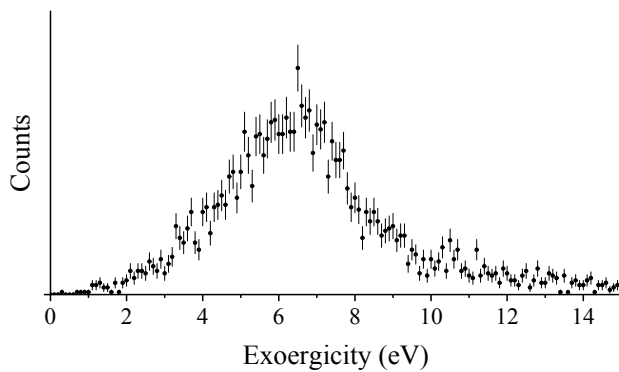

Figure SI 1: Total exoergicity spectrum for the DSET reaction,  $\text{Ar}^{2+} + \text{N}_2 \rightarrow \text{Ar}^+ + \text{N}^+ + \text{N}$ . The error bars represent two standard deviations of the associated counts.
